# Supplementary material
Source: publisher figshare collection journal article supplement (https://frontiersin.figshare.com/ndownloader/files/21892698)
Supplement: Supplementary file [file 21892698]

## Supplementary material

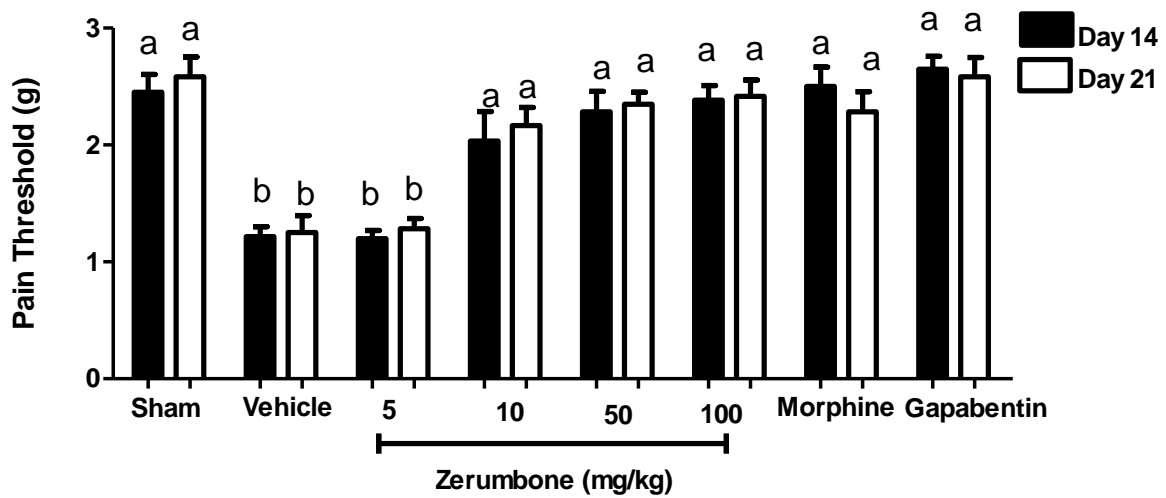

**Fig. S1.** Effects of Zerumbone on CCI-induced neuropathic pain in mice on day 14 and day 21 using the von Frey filament assessment for the ipsilateral paw. Each column represents the mean  $\pm$  SEM of six mice. Statistical analysis was determined by one-way ANOVA followed by Tukey's post-hoc test with values of different superscript letters (a,b) as statistically different from each other ( $p < 0.05$ ).

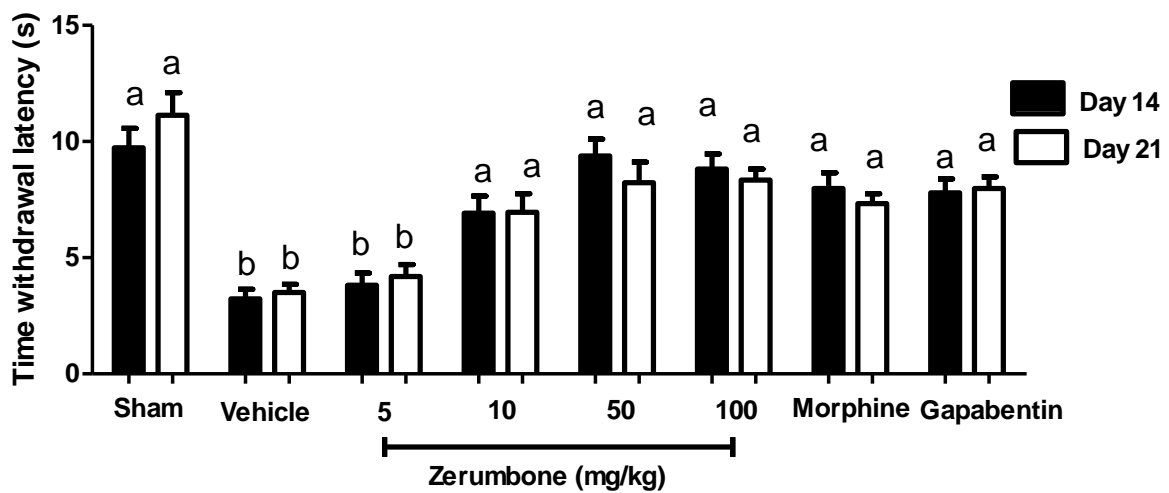

**Fig. S2.** Effects of Zerumbone on CCI-induced neuropathic pain in mice on day 14 and day 21 using the Hargreaves plantar test assessment for ipsilateral paw. Each column represents the mean  $\pm$  SEM of six mice. Statistical analysis was determined by one-way ANOVA followed by Tukey's post-hoc test with values of different superscript letters (a,b) as statistically different from each other ( $p < 0.05$ ).

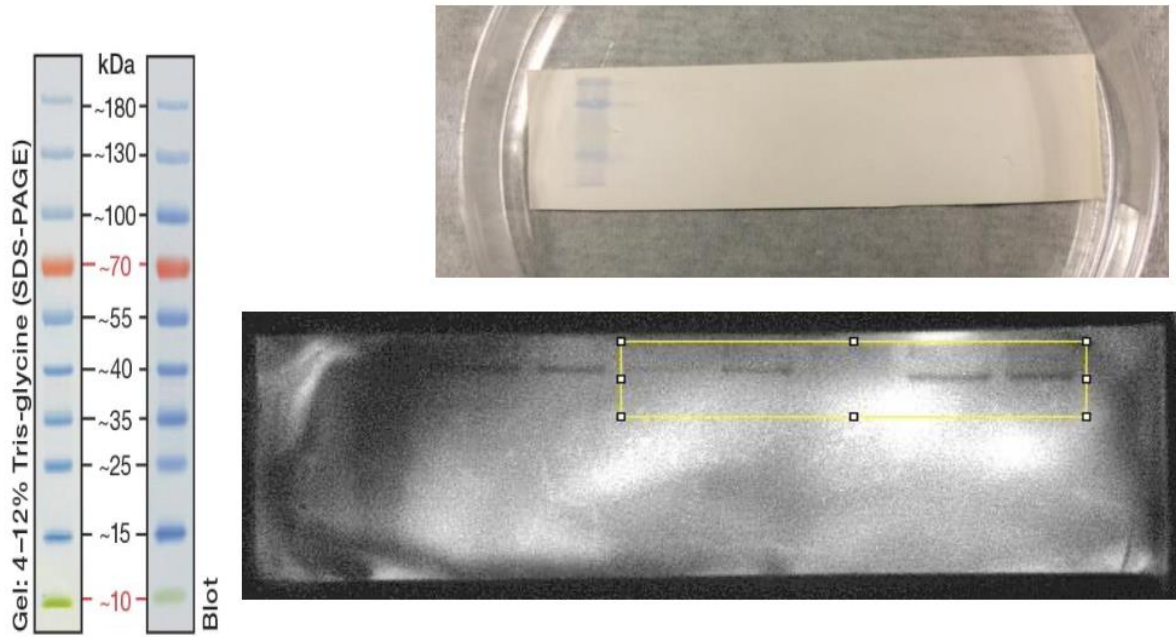

**Fig. S3.** Full image scan of  $\alpha_{2A}$ -adrenergic receptor blot with ladder on the left lane. Band to correspond to ~48 kDa.

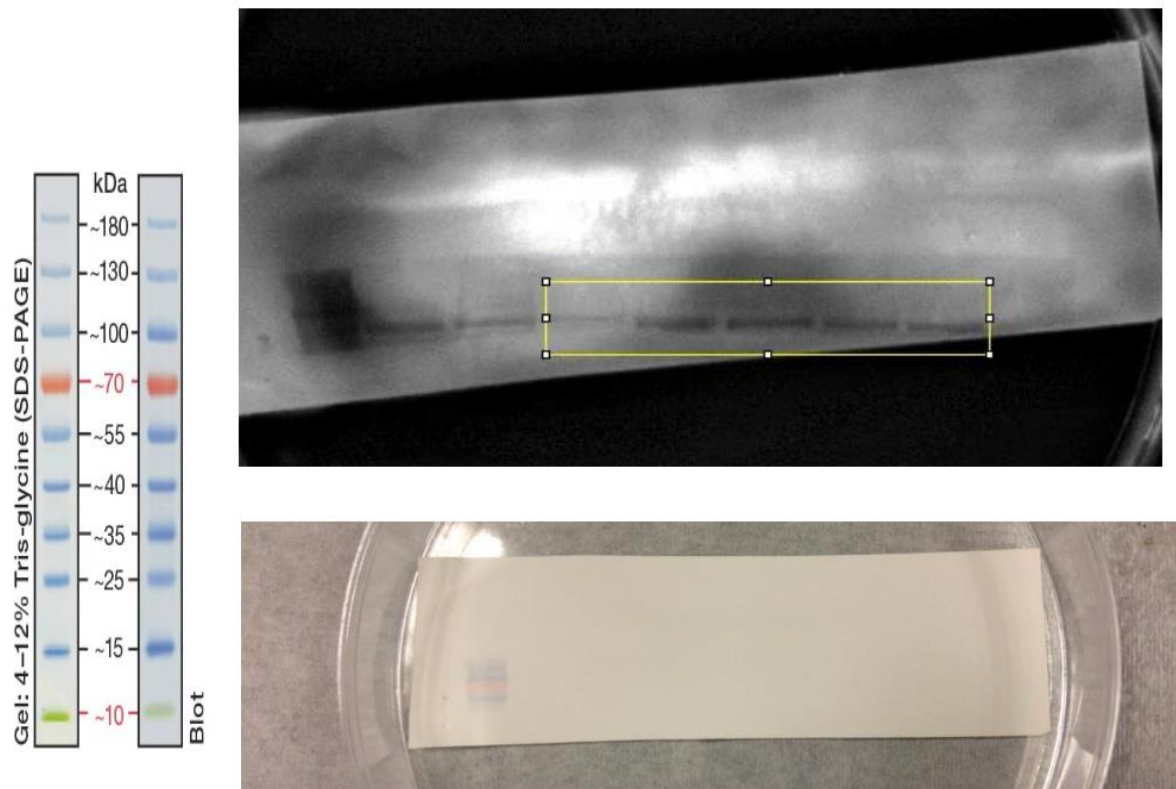

**Fig. S4.** Full image scan of TRPV1 receptor blot with ladder on the left lane. Band to correspond to ~92 kDa.

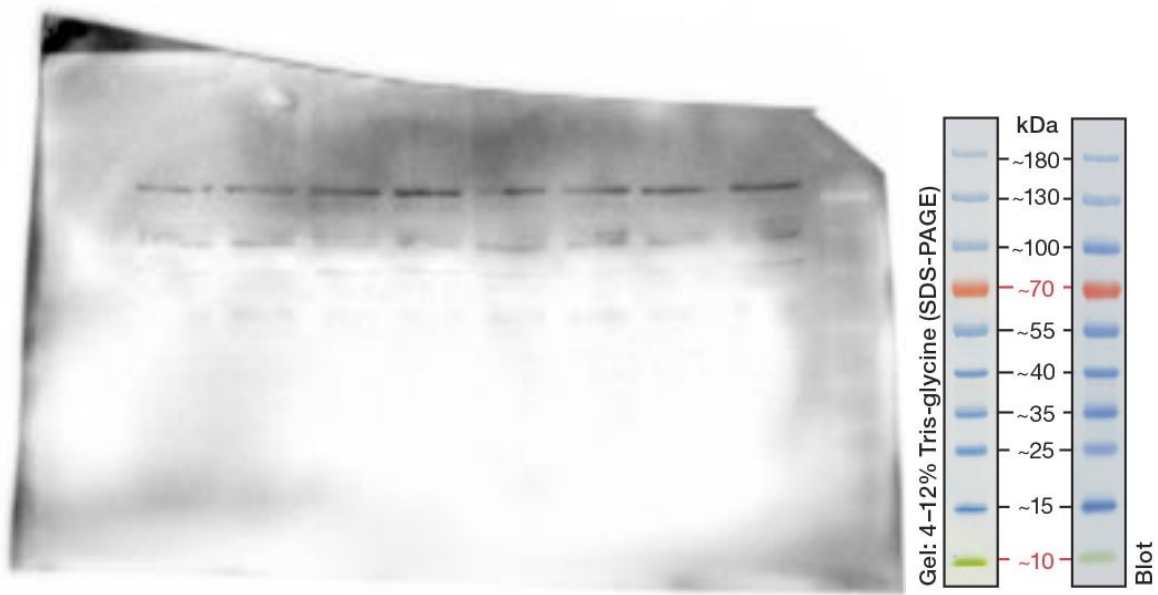

**Fig. S5.** Full image scan of NMDA NR2B receptor blot with ladder mildly visible on the right most lane. Band to correspond to ~160 kDa.

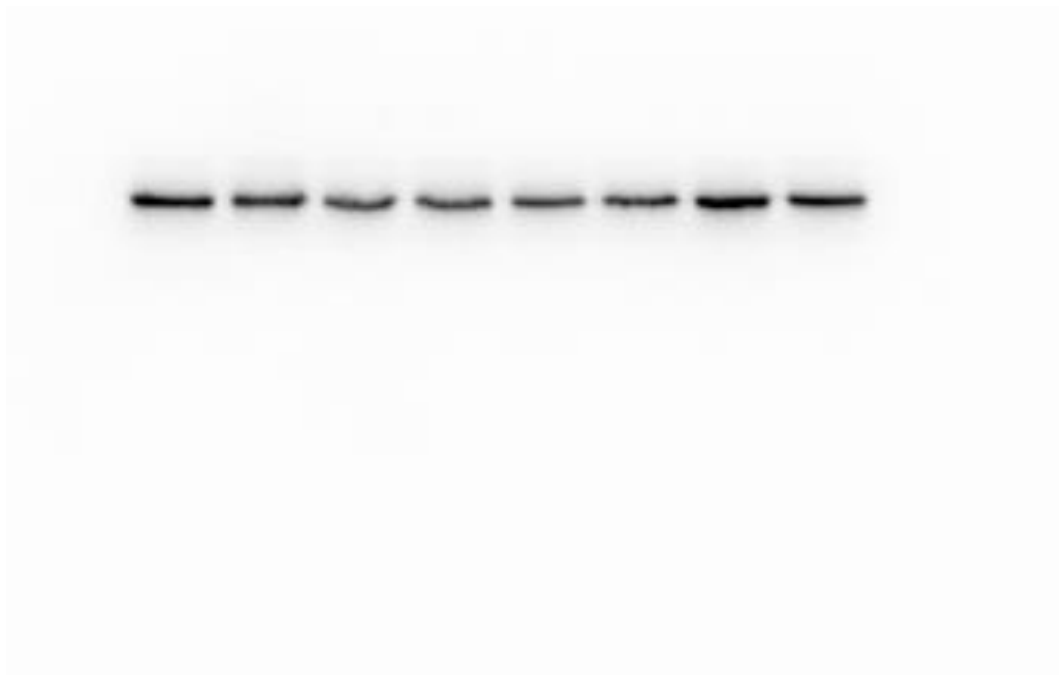

**Fig. S6.** Full image scan of  $\beta$ -actin blot.

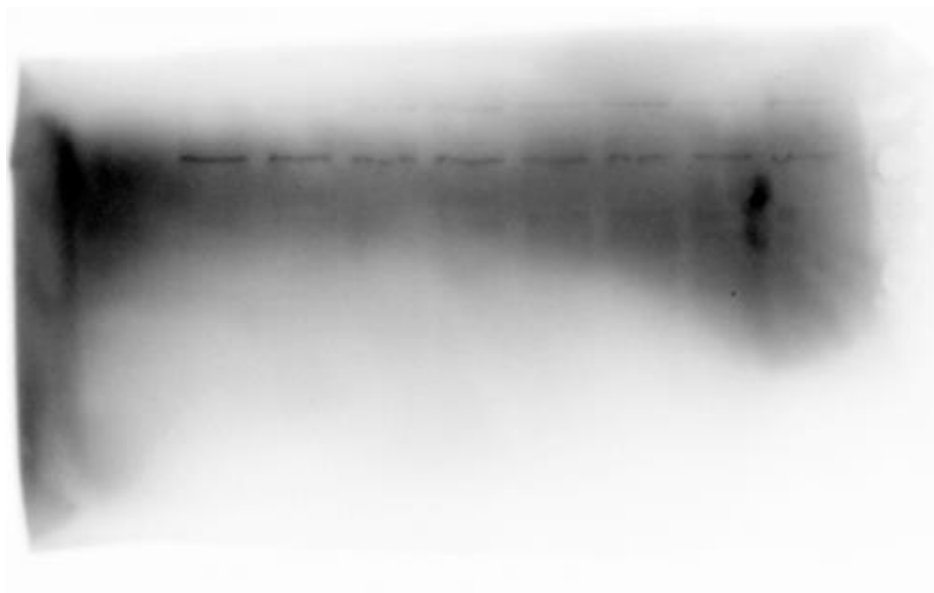

**Fig. S7.** Full image scan of  $\alpha_{2A}$ -adrenergic receptor blot.

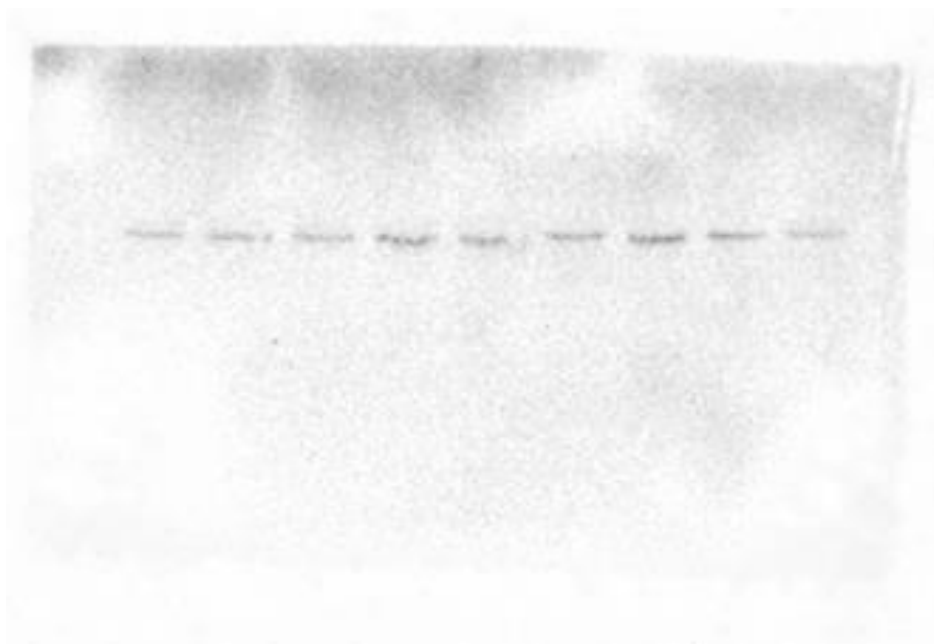

**Fig. S8.** Full image scan of TRPV1 receptor blot.

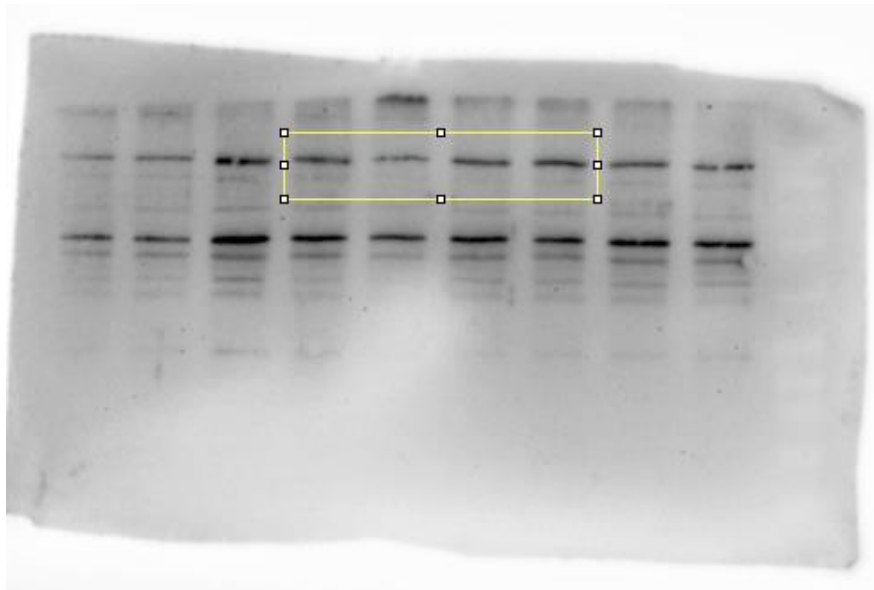

**Fig. S9.** Full image scan of NMDA NR2B receptor blot.
